# Supplementary material for: CRISPR/Cas9‐mediated saturated mutagenesis of the cotton MIR482 family for dissecting the functionality of individual members in disease response
Source: PubMed Central journal article supplement — Plant Direct. 2022 Jun 6;6(6):e410. doi: 10.1002/pld3.410 (PMC9170593; doi:10.1002/pld3.410), 2022-06-06

Figure S1: gRNA38-guided editing in *MIR482a\_A04* (1 mismatch) and *MIR482c\_D04* (0 mismatch) in M482-26-1 (T<sub>0</sub>)

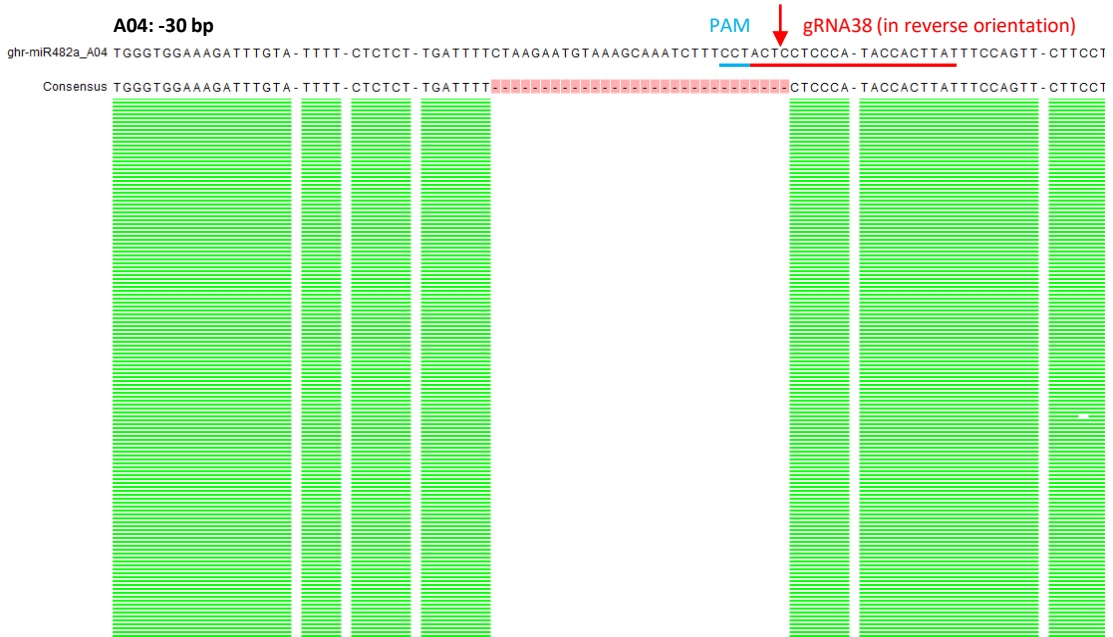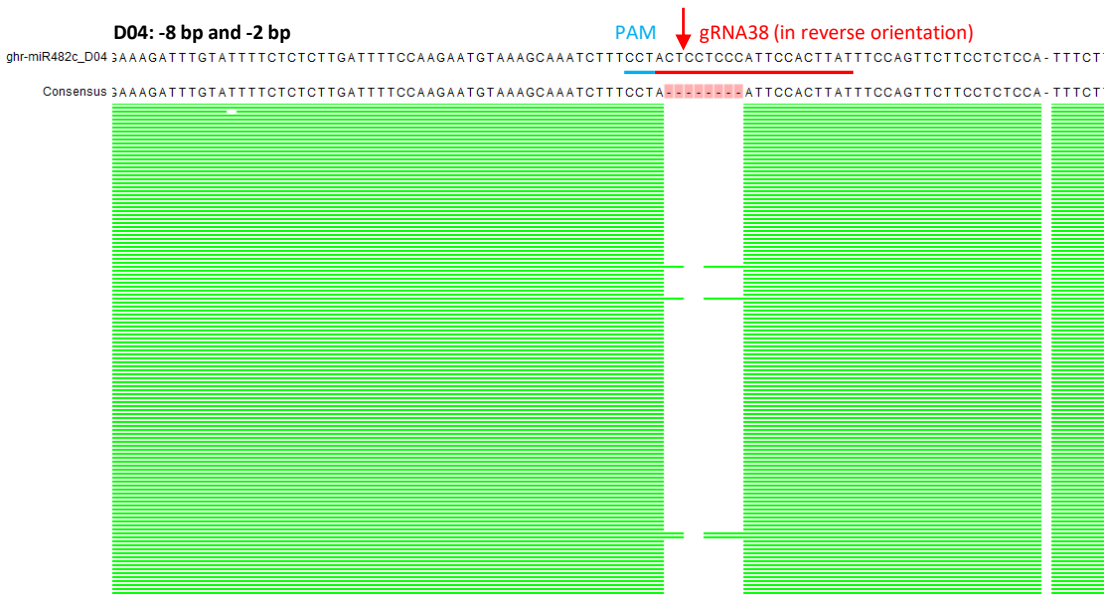

Figure S2: gRNA35-guided editing in *MIR482b\_A13* (0 mismatch) and *MIR482b\_D13* (0 mismatch) in M482-13-1 (T<sub>0</sub>)

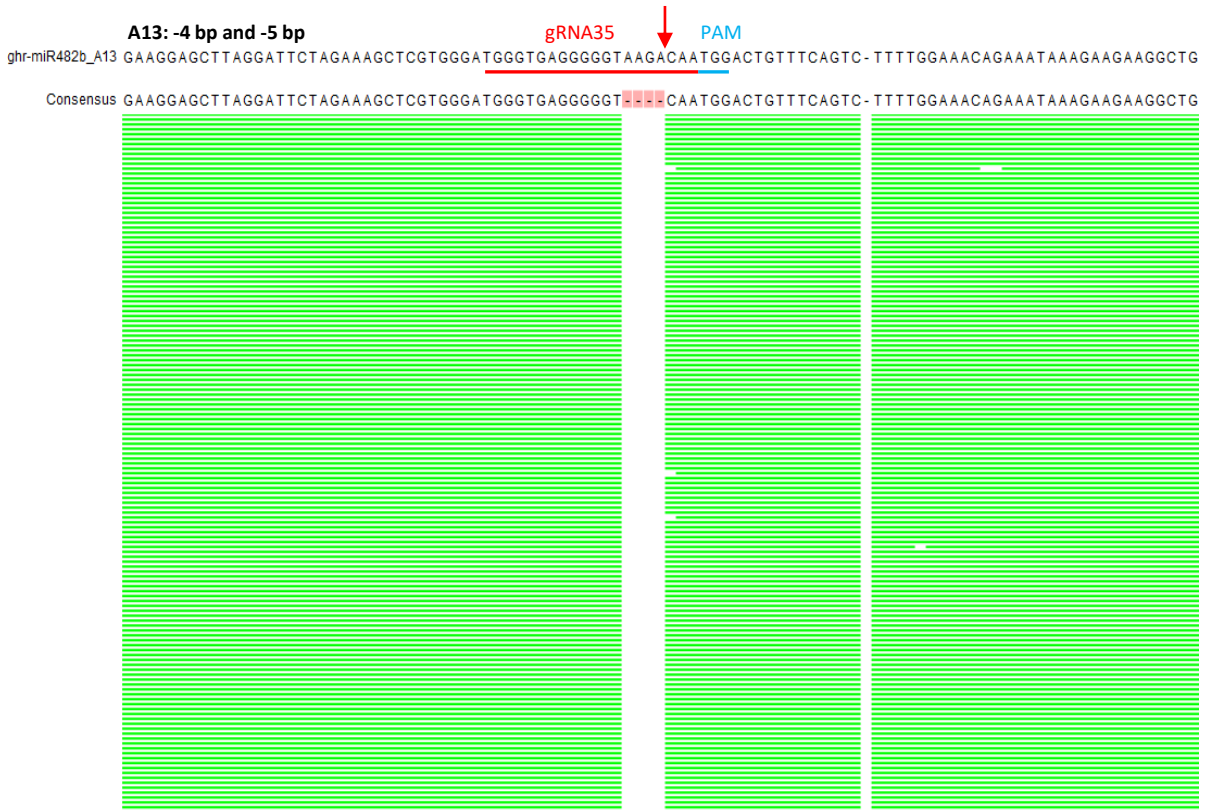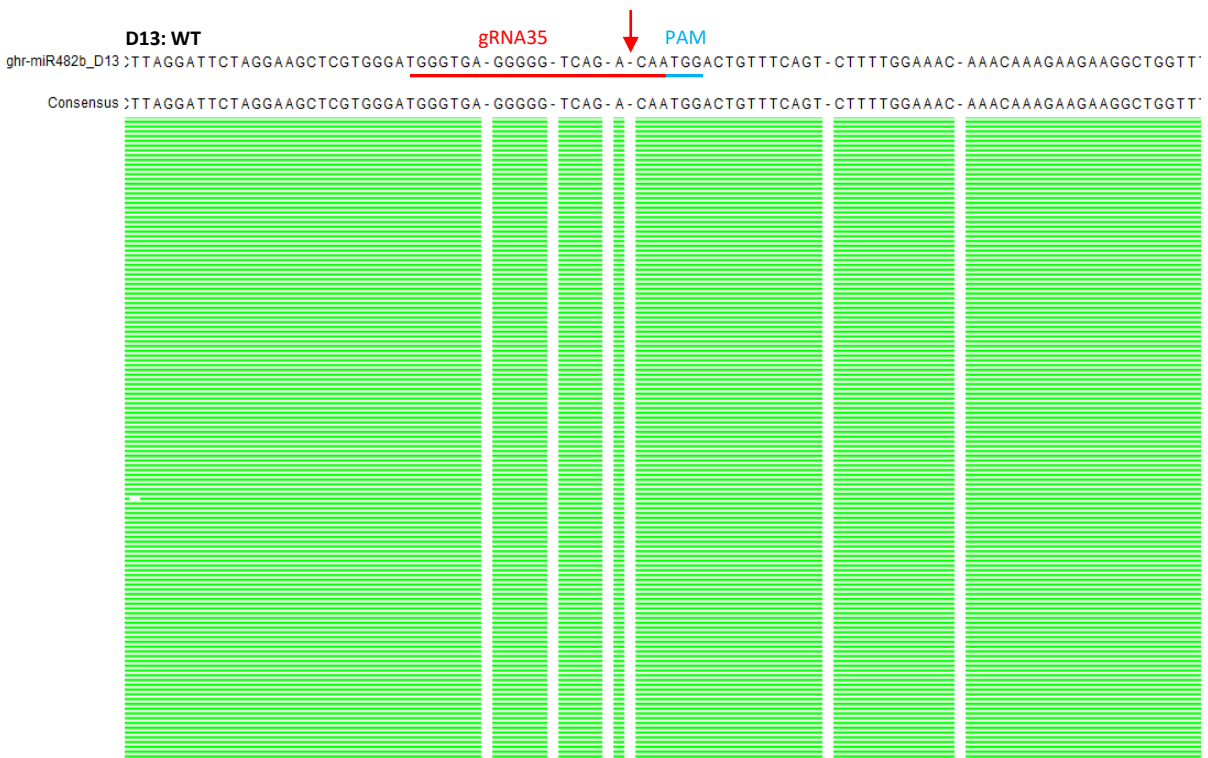

Figure S3: Comparison of the secondary structures of *MIR482a* and *MIR482c* before and after editing by gRNA38.

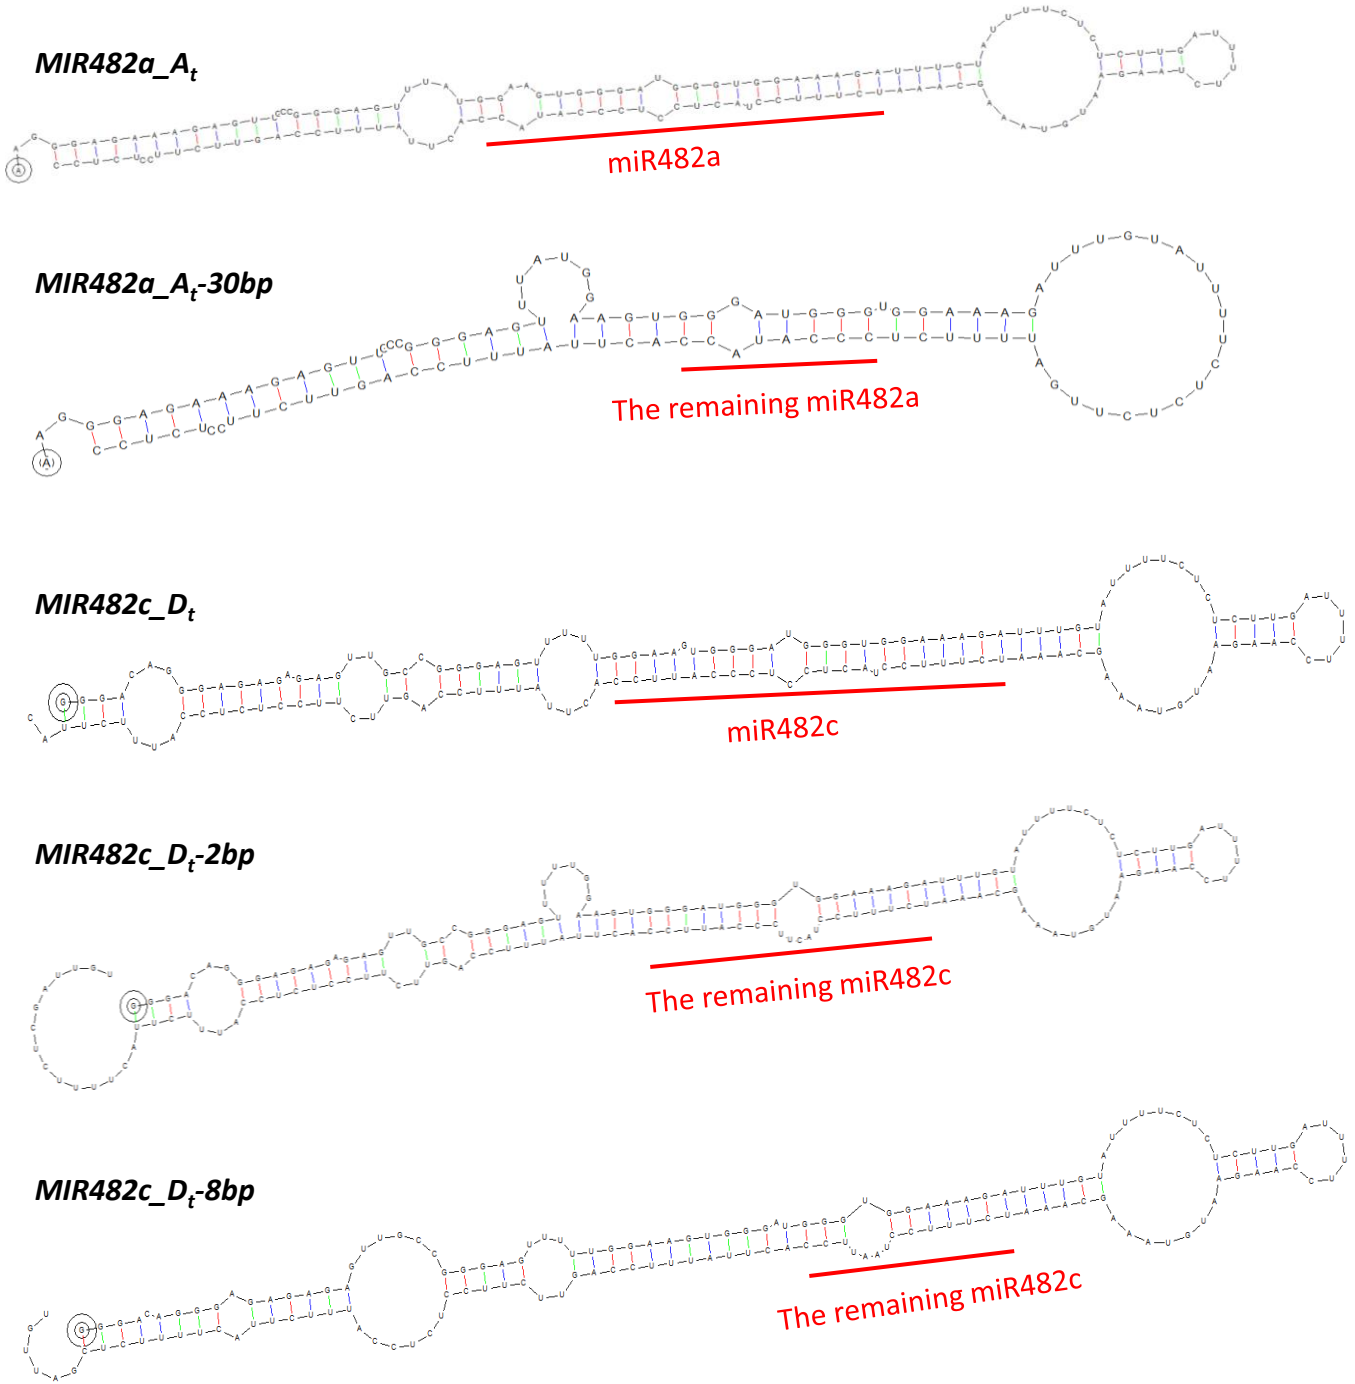

Figure S4: Comparison of the secondary structures of *MIR482k* before and after editing by gRNA50.

**MIR482k<sub>A<sub>t</sub></sub>**

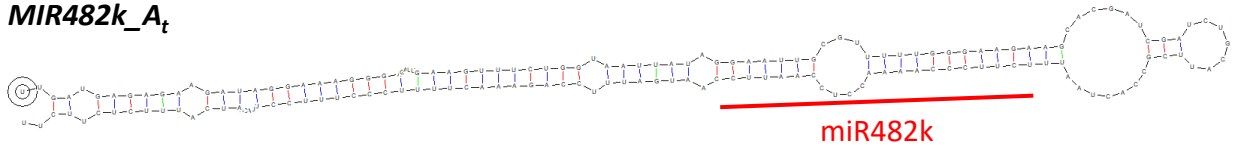

**MIR482k<sub>A<sub>t</sub></sub>-1bp**

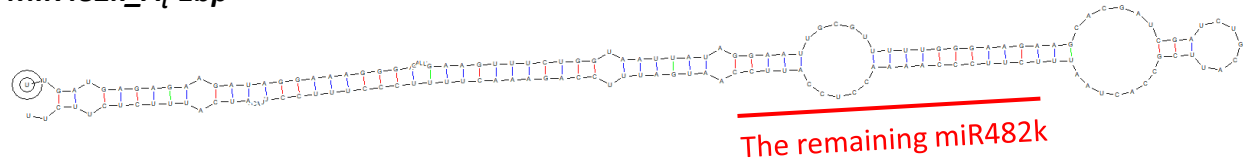

**MIR482k<sub>A<sub>t</sub></sub>-8bp**

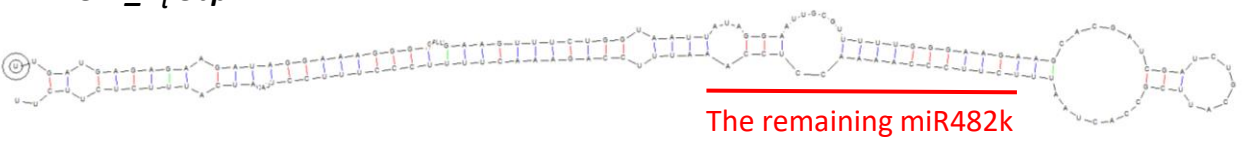

**MIR482k<sub>A<sub>t</sub></sub>+1bp**

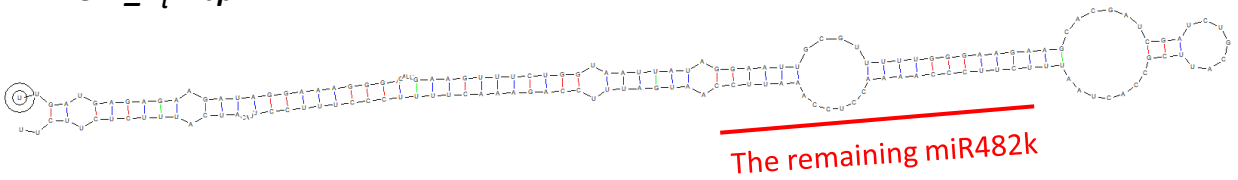

**MIR482k<sub>D<sub>t</sub></sub>**

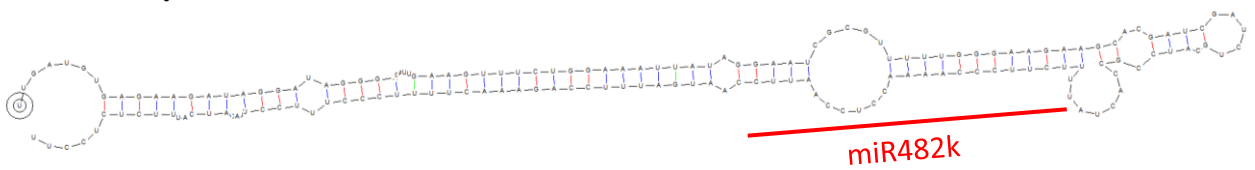

**MIR482k<sub>D<sub>t</sub></sub>-1bp**

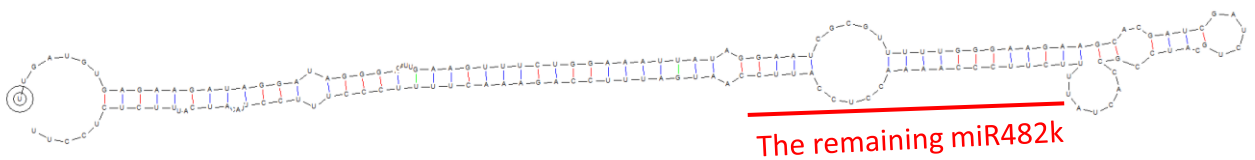

**MIR482k<sub>D<sub>t</sub></sub>+1bp**

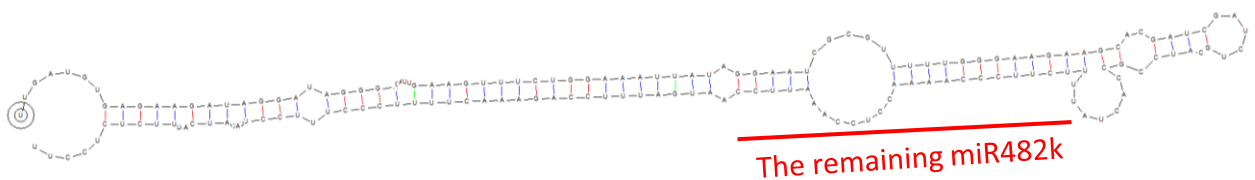

Supplement: PLD3-6-e410-s002.pdf [file PLD3-6-e410-s002.pdf]
